# Supplementary material for: Optical anisotropy induced by ultra-strong interfacial coupling in CVD-grown WSe 2 /ReSe 2 vertical heterostructures
Source: Royal Society of Chemistry journal article supplement (doi:10.1039/d5ra08161k), 2026-01-01
Supplement: d5ra08161k1.pdf [file d5ra08161k1.pdf]

## Optical anisotropy induced by ultra-strong interfacial coupling in CVD-grown WSe<sub>2</sub>/ReSe<sub>2</sub> vertical heterostructures†

Yong Guo<sup>a†</sup>, Xiaofei Yue<sup>\*ab†</sup>, Jiajun Chen<sup>b†</sup>, Qingqing Nie<sup>b</sup>, Chenxu Sheng<sup>b</sup>, Haoyu Wang<sup>a</sup>, Yongsheng Qin<sup>a</sup>, Xuechao Liu<sup>c</sup>, Siqi Lin<sup>a</sup>, Le Fang<sup>a</sup>, Miaosen Yang<sup>a</sup>, Zhijun Qiu<sup>b</sup>, Min Jin<sup>\*a</sup> and Chunxiao Cong<sup>\*b</sup>

<sup>a</sup>College of Materials, Shanghai Dianji University, Shanghai 201306, China.

<sup>b</sup>School of Information Science and Technology, Fudan University, Shanghai 200433, China.

<sup>c</sup>State Key Laboratory of Functional Crystals and Devices, Shanghai Institute of Ceramics, Chinese Academy of Sciences, Shanghai 200050, China

†Electronic Supplementary Information (ESI) available. See DOI:

†These authors contribute equally to this study.

\*Corresponding authors: [xf-yue@sdju.edu.cn](mailto:xf-yue@sdju.edu.cn), [jmaish@aliyun.com](mailto:jmaish@aliyun.com), [cxcong@fudan.edu.cn](mailto:cxcong@fudan.edu.cn)

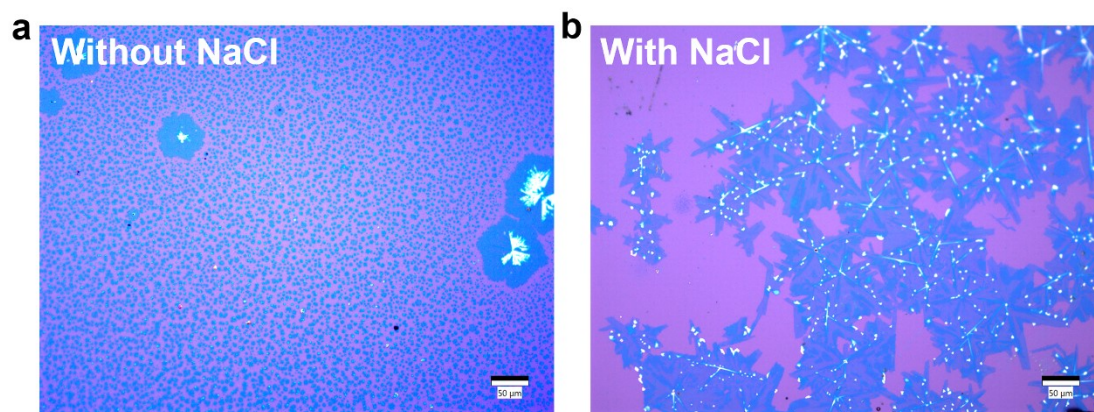

**Fig. S1** (a) Optical image of the CVD-grown  $\text{WSe}_2/\text{ReSe}_2$  vertical heterostructures without NaCl assistance. (b) Optical image of the CVD-grown  $\text{WSe}_2/\text{ReSe}_2$  vertical heterostructures with NaCl assistance.

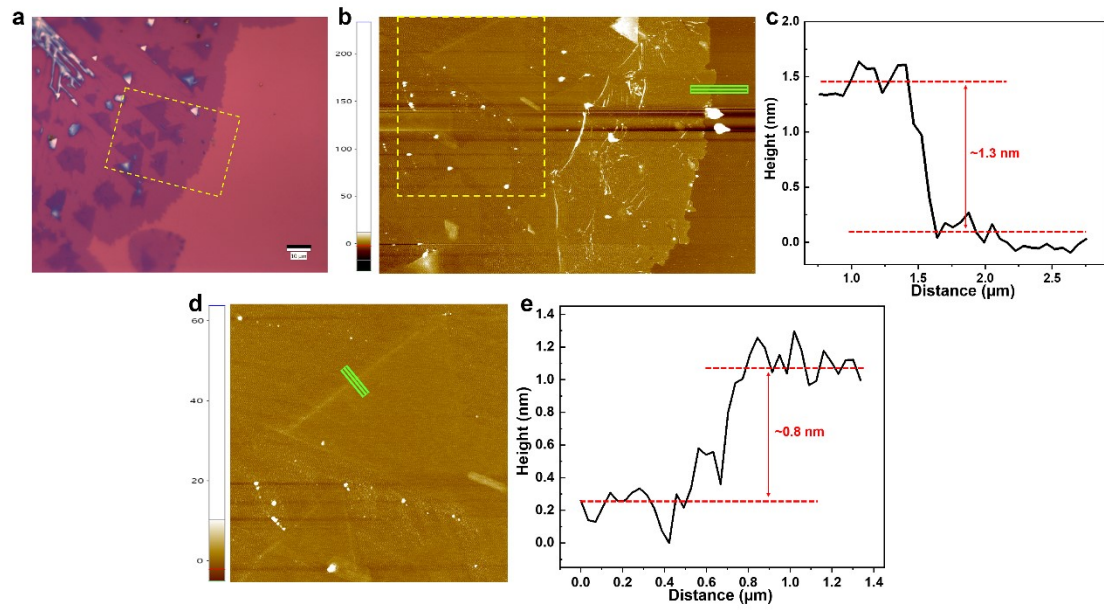

**Fig. S2** (a) Optical image of the CVD-grown WSe<sub>2</sub>/ReSe<sub>2</sub> vertical heterostructures. (b) AFM scanning image of the yellow rectangular frame region marked in (a). (c) The height profile corresponding to the green line scanning marked in (b). (d) High-resolution AFM scanning image of the yellow rectangular frame region marked in (b). (e) The height profile corresponding to the green line scanning marked in (d).

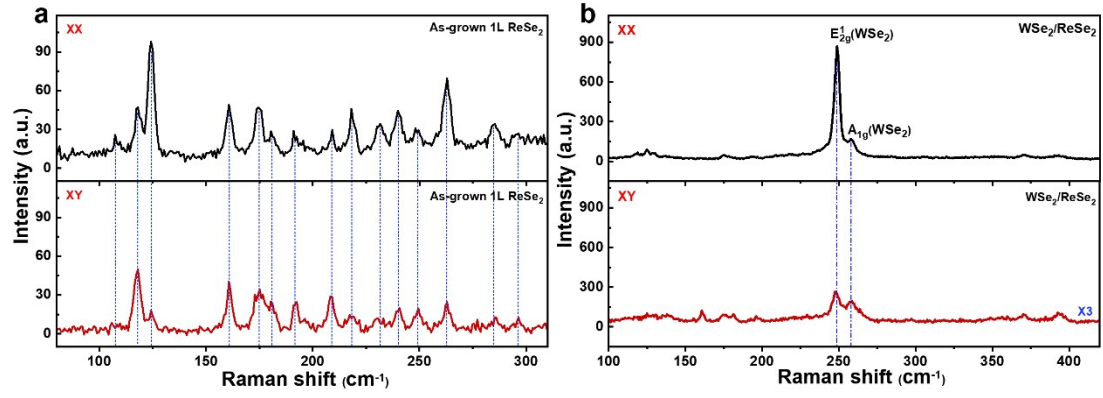

**Fig. S3** (a) Polarized Raman spectra of the as-grown monolayer  $\text{ReSe}_2$  under parallel and crossed configurations. (b) Polarized Raman spectra of the as-grown  $\text{WSe}_2/\text{ReSe}_2$  vertical heterostructures under parallel and crossed configurations.

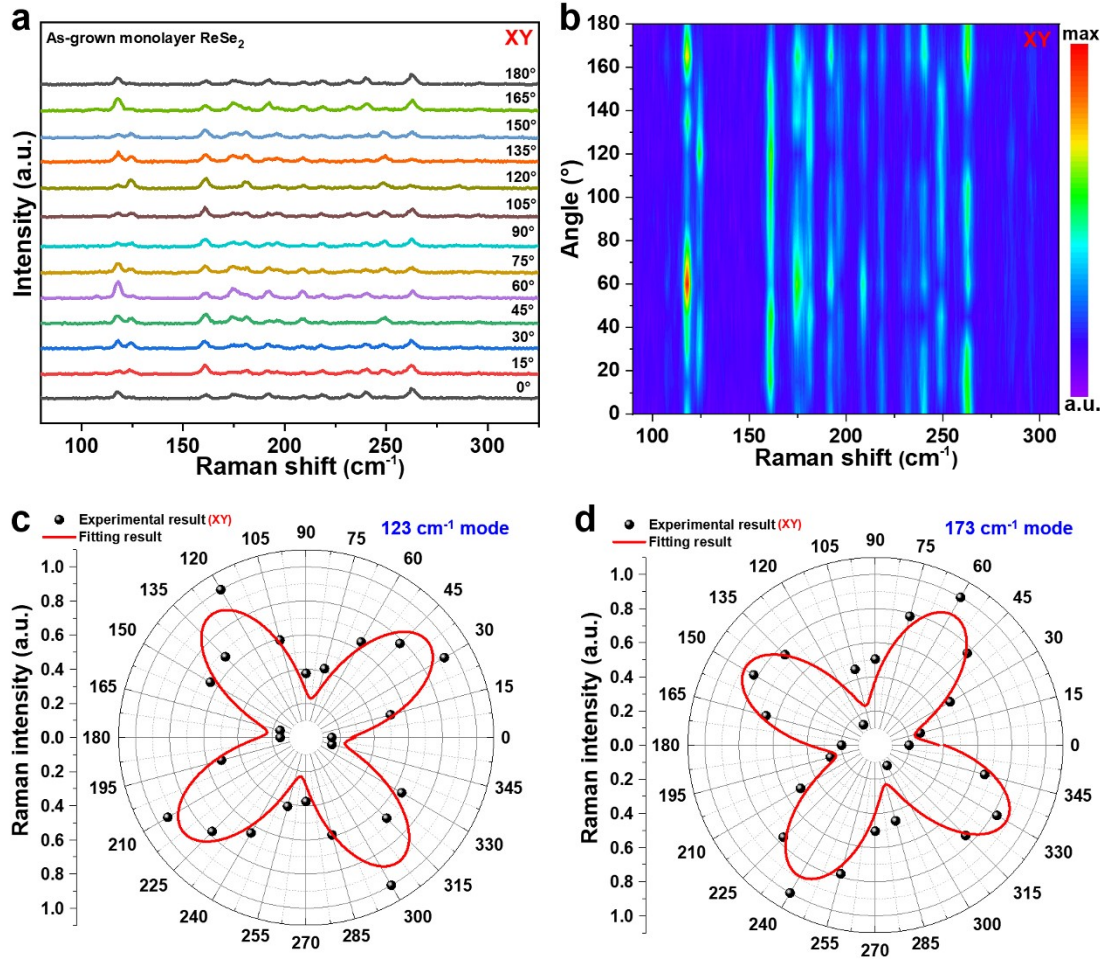

**Fig. S4** (a) Angle-resolved polarized Raman spectra of the as-grown monolayer  $\text{ReSe}_2$  under crossed configurations. (b) The Raman intensity color map corresponding to (a). (c) and (d) The normalized Raman intensities of  $\text{ReSe}_2$   $123 \text{ cm}^{-1}$  and  $173 \text{ cm}^{-1}$  modes as a function of rotation angle.

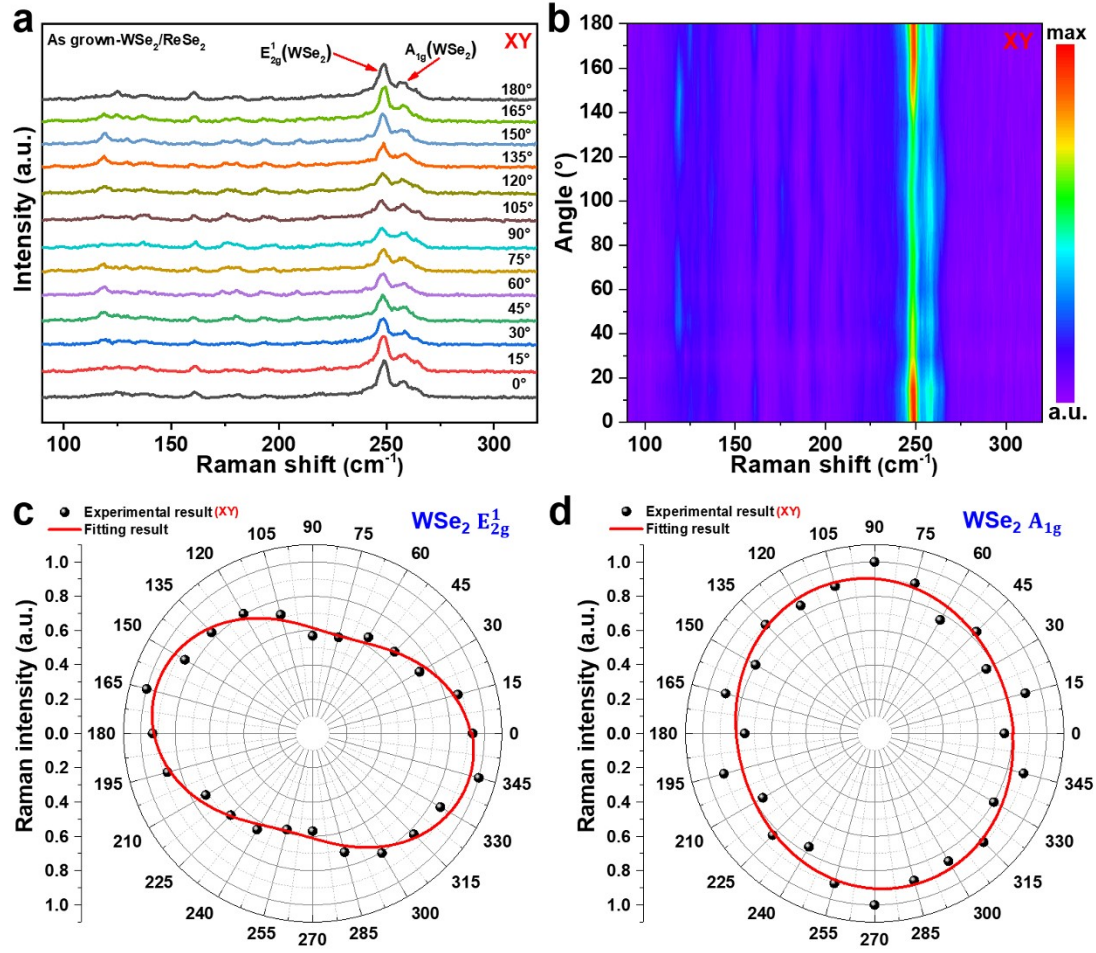

**Fig. S5** (a) Angle-resolved polarized Raman spectra of the as-grown  $\text{WSe}_2/\text{ReSe}_2$  vertical heterostructure under crossed configuration. (b) The Raman intensity color map corresponding to (a). (c) and (d) The normalized Raman intensities of  $\text{WSe}_2 E_{2g}^1$  and  $A_{1g}$  modes as a function of rotation angle.

| Calculated in ref. 25<br>Peak position (cm <sup>-1</sup> ) | Measured in ref. 25<br>Peak position (cm <sup>-1</sup> ) | This work<br>Peak position (cm <sup>-1</sup> ) |
|------------------------------------------------------------|----------------------------------------------------------|------------------------------------------------|
| 103.6                                                      | 110.0                                                    | 106.2                                          |
| 118.0                                                      | 116.7                                                    | 116.4                                          |
| 123.1                                                      | -                                                        | -                                              |
| 125.9                                                      | 123.8                                                    | 123.0                                          |
| 162.5                                                      | 158.2                                                    | 159.7                                          |
| 175.6                                                      | 171.0                                                    | 173.1                                          |
| 179.4                                                      | 179.0                                                    | 176.5                                          |
| 182.6                                                      | -                                                        | 179.8                                          |
| 194.9                                                      | 190.0                                                    | 190.3                                          |
| 197.7                                                      | 194.0                                                    | 195.1                                          |
| 206.8                                                      | 207.7                                                    | 207.2                                          |
| 219.9                                                      | 217.2                                                    | 216.7                                          |
| 235.1                                                      | 231.8                                                    | 229.8                                          |
| 242.4                                                      | 239.0                                                    | 238.7                                          |
| 251.7                                                      | 247.1                                                    | 247.4                                          |
| 265.8                                                      | 260.4                                                    | 261.2                                          |
| 287.9                                                      | 283.6                                                    | 283.6                                          |
| 298.4                                                      | 293.9                                                    | 294.5                                          |

**Table S1** The fitted frequencies of the 17 Raman modes measured in the as-grown monolayer ReSe<sub>2</sub>, and the contrast with the calculated values.
